# Supplementary material for: Enhanced removal of heavy metal ions from aqueous solution using manganese dioxide-loaded biochar: Behavior and mechanism
Source: PubMed Central journal article supplement (PMC7142110; doi:10.1038/s41598-020-63000-z), 2020-04-08
Supplement: 41598_2020_63000_MOESM1_ESM.pdf [file 41598_2020_63000_MOESM1_ESM.pdf]

## **Supporting Information (SI)**

### **Enhanced removal of heavy metal ions from aqueous solution using manganese dioxide-loaded biochar: Behavior and mechanism**

Haipeng Zhang<sup>a,b</sup>, Fangfang Xu<sup>b</sup>, Jinyuan Xue<sup>b</sup>, Shiyong Chen<sup>b</sup>, Juanjuan Wang<sup>b</sup>, Yanju Yang<sup>b,\*</sup>

<sup>a</sup> *Jiangsu Key Laboratory of Crop Genetics and Physiology, Jiangsu Co-Innovation Center for Modern Production Technology of Grain Crops, Yangzhou University, Yangzhou 225009, China*

<sup>b</sup> *College of Environmental Science and Engineering, Yangzhou University, Yangzhou 225009, China*

The SI contains 12 total pages with 4 Figures.

\*Corresponding author:

*E-mail address:* yangyanju@yzu.edu.cn (Y.J. Yang).

**Figure captions:**

**Figure S1:** (a) N<sub>2</sub> adsorption-desorption isotherms and (b) pore size distributions of the samples.

**Figure S2:** Fitting kinetics of heavy metal ions adsorption onto BC@MnO<sub>2</sub>-26.6 using (a) the pseudo-first-order model, (b) the pseudo-second-order model and (c) the Webber-Morris model.

**Figure S3:** Effect of co-existing ions on heavy metal ions onto BC.

**Figure S4:** XPS spectra of BC@MnO<sub>2</sub>-26.6 after the sorption of Cu(II), Cd(II) and Zn(II). (a) Cu 2p, (b) Cd 3d and (c) Zn 2p.

### Sorption kinetic models:

The kinetic data of Pb(II), Cd(II), Cu(II) and Zn(II) sorption onto BC@MnO<sub>2</sub>-26.6 were analyzed using two widely used kinetic models, the pseudo-first-order model, the pseudo-second-order model and the Webber-Morris model. The pseudo-first-order kinetic model is described as equation (1) [1]:

$$\log(q_e - q_t) = \log q_e - k_1 t \quad (1)$$

where  $q_e$  (mg g<sup>-1</sup>) and  $q_t$  (mg g<sup>-1</sup>) are the amount of Pb(II), Cd(II), Cu(II) and Zn(II) adsorbed at equilibrium and at time  $t$  (min), respectively.  $k_1$  (min<sup>-1</sup>) is the first-order sorption kinetic constant.

The pseudo-second-order equation is as following [2]:

$$\frac{t}{q_t} = \frac{1}{k_2 q_e^2} + \frac{1}{q_e} t \quad (2)$$

where  $q_e$  (mg g<sup>-1</sup>) and  $q_t$  (mg g<sup>-1</sup>) are adsorption capacities of Pb(II), Cd(II), Cu(II) and Zn(II) at equilibrium and at time  $t$  (min), respectively, and  $k_2$  (g mg<sup>-1</sup> min<sup>-1</sup>) is the second-order sorption rate constant.

The Webber-Morris model is described as equation (3) [3]:

$$q_t = k_{id} t^{1/2} + C_i \quad (3)$$

where  $q_t$  (mg g<sup>-1</sup>) is the amount of adsorbed Pb(II), Cd(II), Cu(II) or Zn(II) at time  $t$  (min),  $k_i$  (mg g<sup>-1</sup> min<sup>-1/2</sup>) is the diffusion rate constant and  $C_i$  is the intercept which provides an idea of the boundary layer thickness.

### Langmuir isotherm model:

The isotherm data of Pb(II), Cd(II), Cu(II) and Zn(II) sorption onto adsorbents were fitted to the Langmuir model according to the equation (4) [4]:

$$\frac{C_e}{q_e} = \frac{1}{K_L q_m} + \frac{1}{q_m} C_e \quad (4)$$

where  $q_e$  ( $\text{mg g}^{-1}$ ) is the amount of adsorbed metal at equilibrium,  $C_e$  ( $\text{mg L}^{-1}$ ) is the equilibrium concentration of heavy metal ions in aqueous solution,  $q_m$  ( $\text{mg g}^{-1}$ ) is the maximum adsorption capacity of heavy metals on adsorbents,  $K_L$  ( $\text{L mg}^{-1}$ ) is a binding constant.

### **Thomas model:**

The Thomas model is used to predict the column breakthrough capacities. The linearized form of the Thomas model is as equation (5) [5]:

$$\ln\left(\frac{C_{\text{in}}}{C_{\text{out}}} - 1\right) = \frac{k_{\text{Th}} q_m m}{Q} - k_{\text{Th}} C_{\text{in}} t \quad (5)$$

where  $C_{\text{in}}$  and  $C_{\text{out}}$  are the influent and effluent, respectively,  $k_{\text{Th}}$  is the Thomas rate constant ( $\text{ml min}^{-1} \text{mg}^{-1}$ ),  $q_m$  is the maximum adsorption capacity ( $\text{mg g}^{-1}$ ),  $Q$  is the flow rate ( $\text{mg min}^{-1}$ ),  $m$  is the mass of adsorbent (g), and  $t$  is the adsorption time (h).

### **Mn(IV) content determination procedures:**

Firstly, total Mn content was measured by dissolving 0.2 g of BC@MnO<sub>2</sub> sample in 50 ml of 0.25 mol L<sup>-1</sup> hydroxylamine hydrochloride, then the resulting Mn(II) content in the solution was diluted with water and was measured by atomic absorption spectrometry (AAS) (Perkin Elmer 2380, USA). Another 0.1 g of BC@MnO<sub>2</sub> sample was completely dissolved in 10 ml of 0.5 mol L<sup>-1</sup> H<sub>2</sub>C<sub>2</sub>O<sub>4</sub> and 10 ml of 1 mol L<sup>-1</sup> H<sub>2</sub>SO<sub>4</sub> to reduce Mn(III) and Mn(VI) to Mn(II) at 75°C. The excess C<sub>2</sub>O<sub>4</sub><sup>2-</sup> was measured by back-titration with a standardized KMnO<sub>4</sub> solution. According to the results of above experiments, the Mn(IV) content in BC@MnO<sub>2</sub> adsorbent were calculated. All

chemical analyses for each sample were performed three times and the mean was recorded.

Figure S1

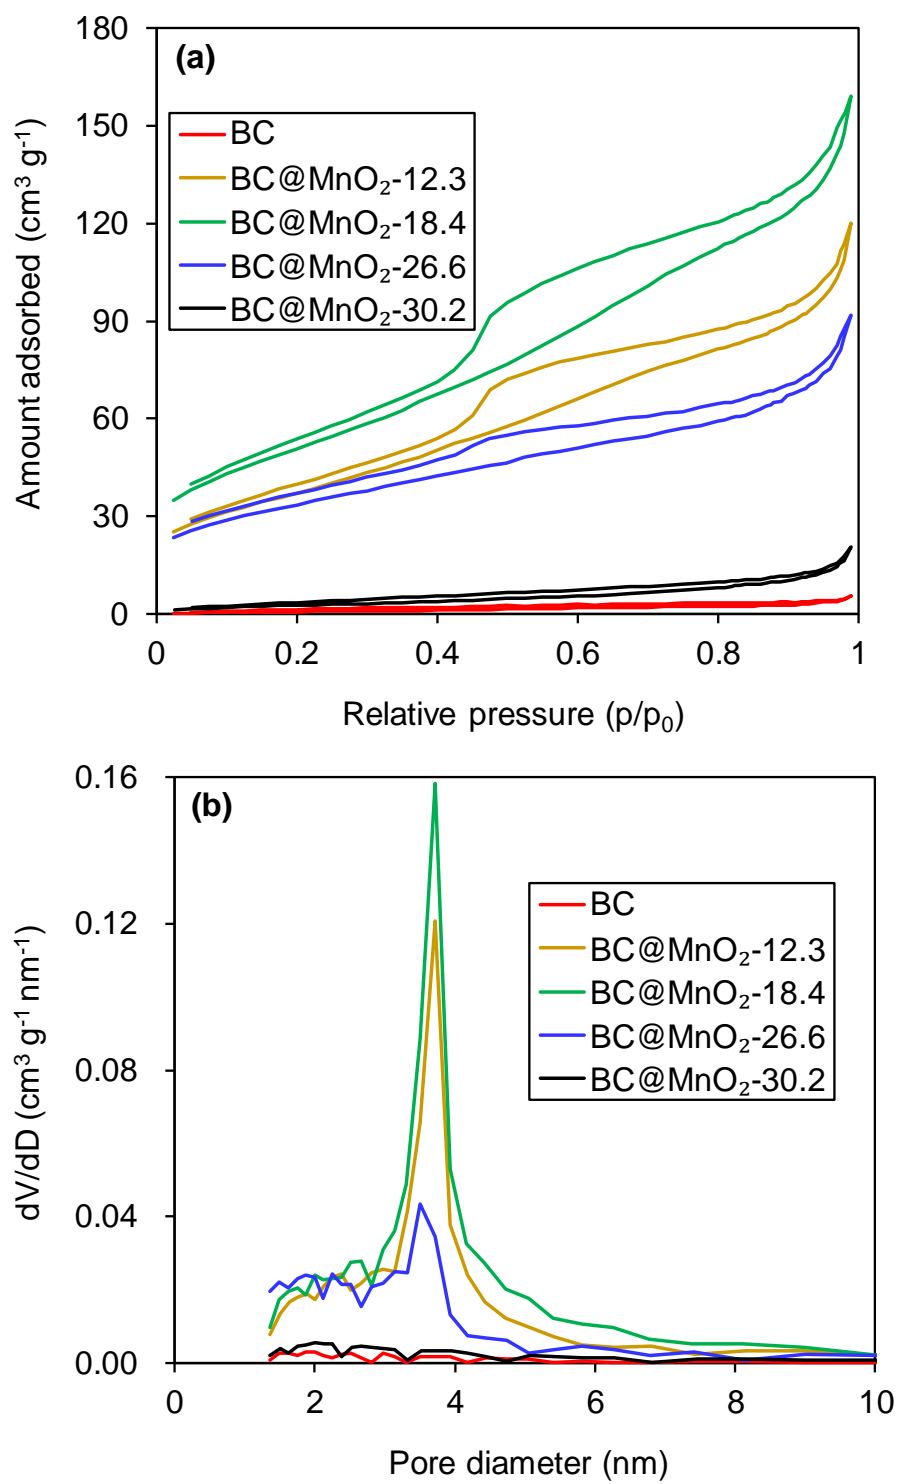

Figure S2:

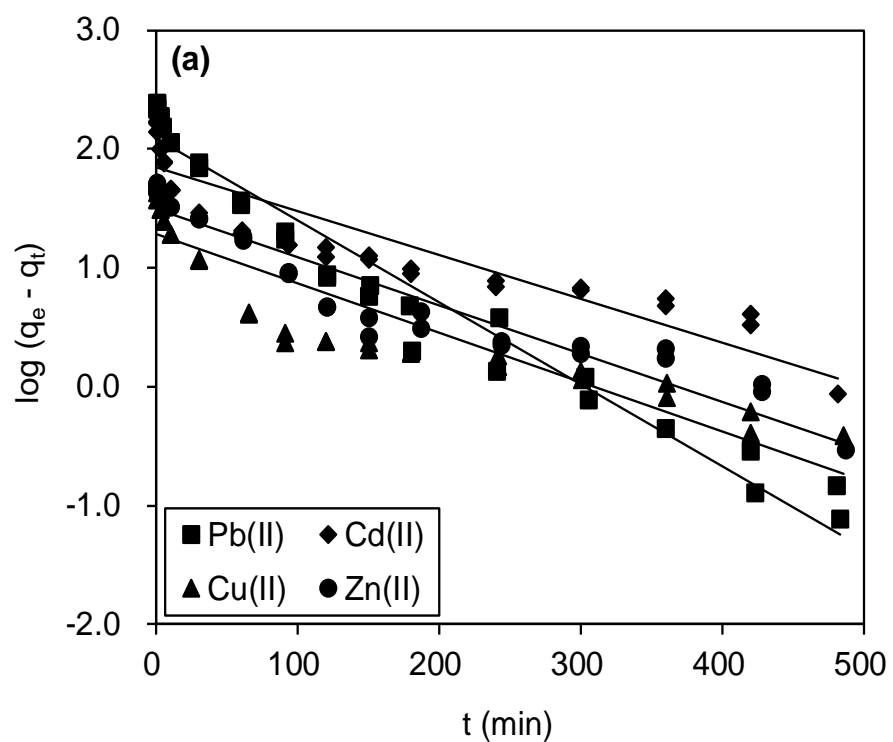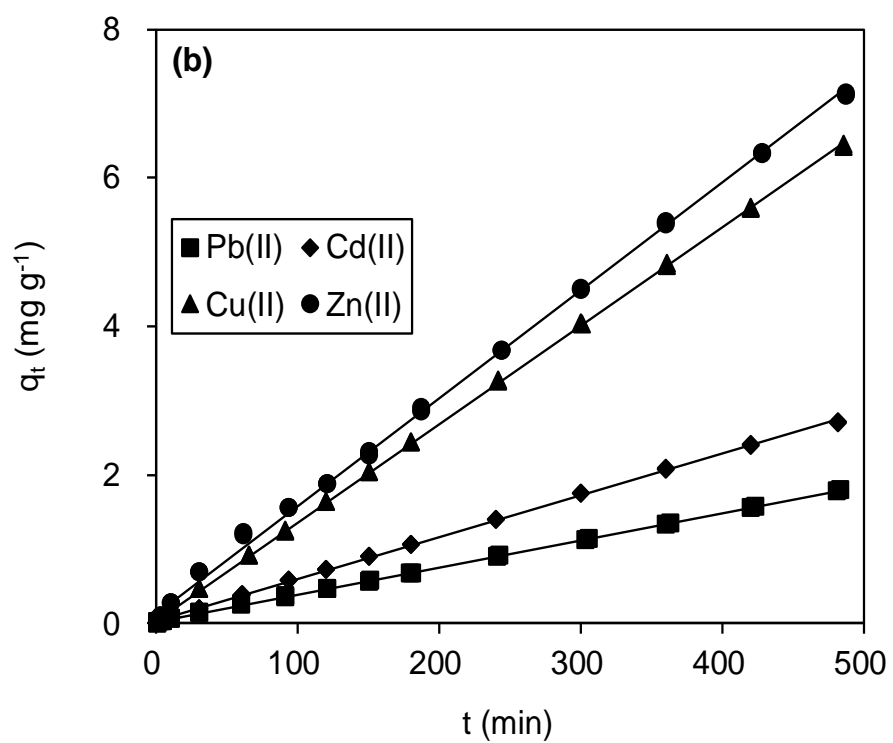

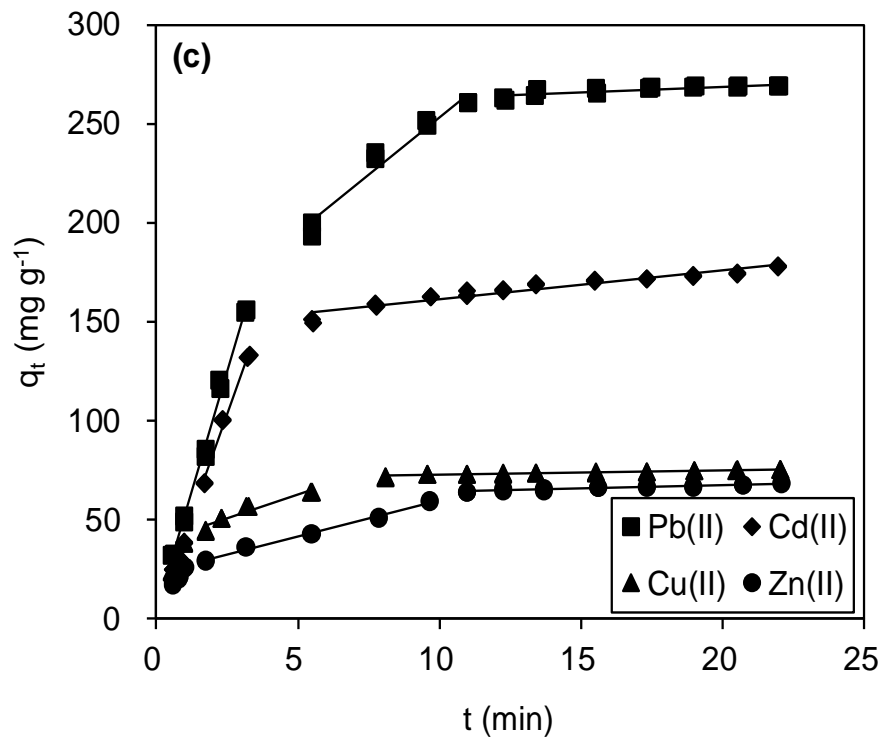



Figure S3:

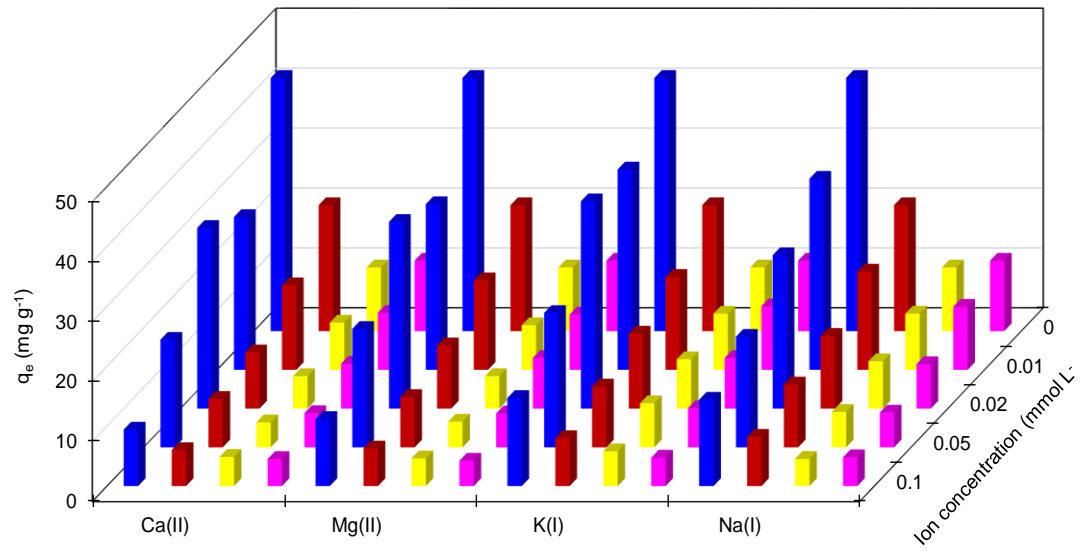

Figure S4:

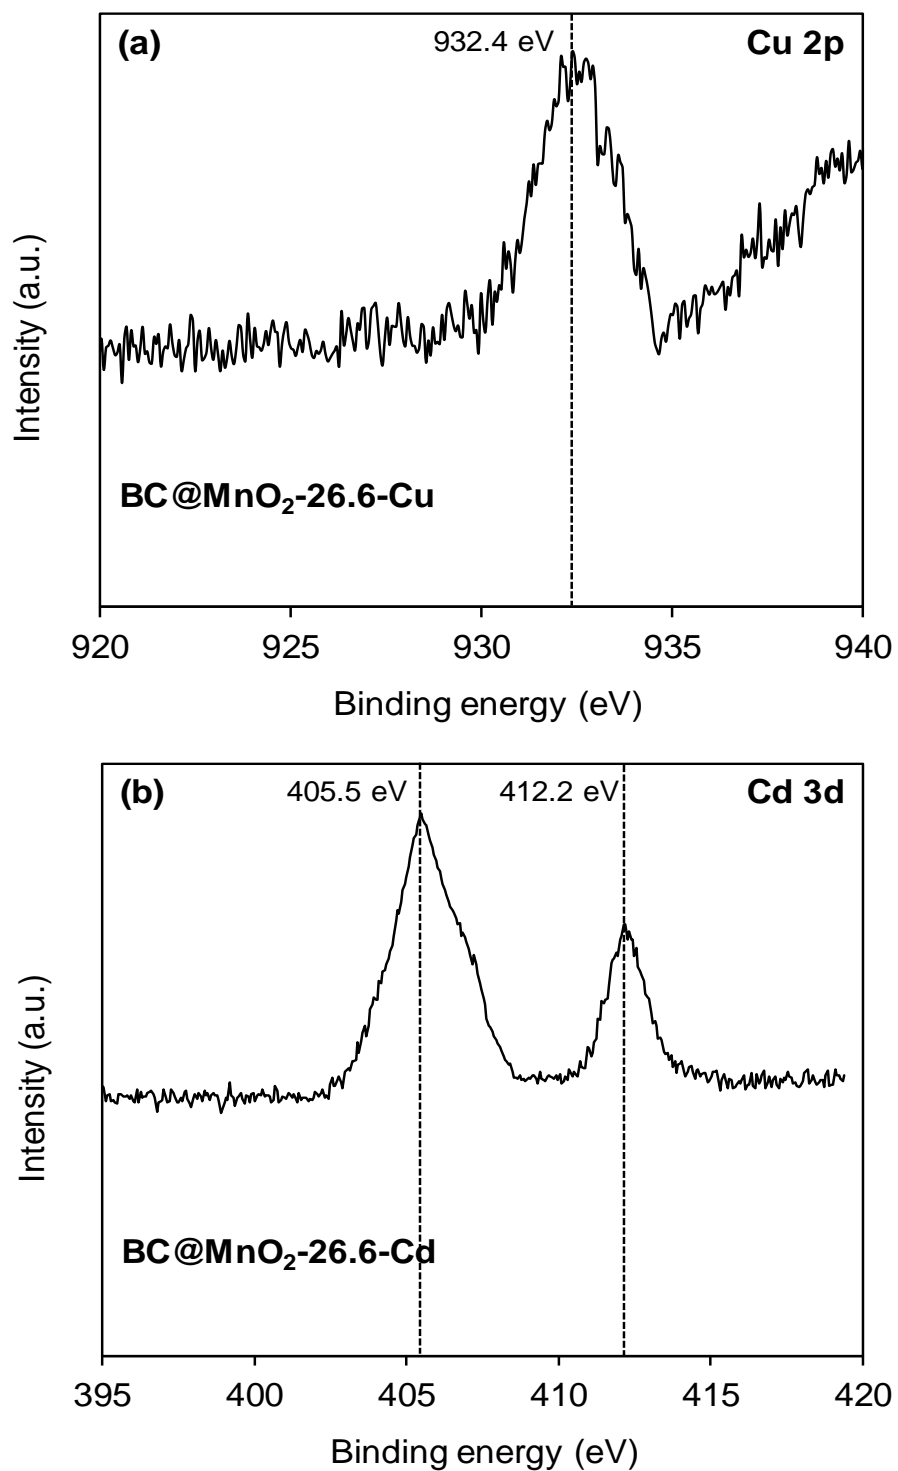

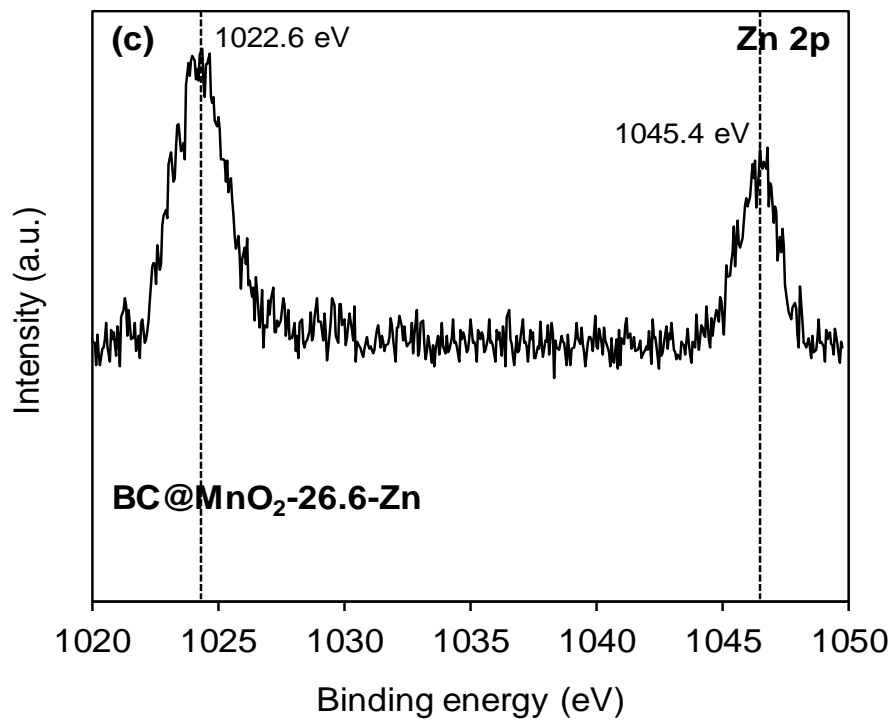

## References

- [1] H.C. Trivedi, V.M. Patel, R.D. Patel. Adsorption of cellulose triacetate on calcium silicate. *Eur. Polym. J.* 1973, 9: 525-531.
- [2] Y.S. Ho, G. McKay. Pseudo-second order model for sorption processes. *Process. Biochem.* 1999, 34: 451-465.
- [3] W.J. Weber, J.C. Morris, Kinetics of adsorption on carbon from solution. *J. Sanit. Eng. Div. Am. Soc. Civ. Eng.* 89 (1963) 31-60.
- [4] J.W. Tonkin, L.S. Balistrieri, J.W. Murray. Modeling sorption of divalent metal cations on hydrous manganese oxide using the diffuse double layer model. *Appl. Geochem.* 19 (2004) 29-53.
- [5] T.Y. Liu, X. Yang, Z.L. Wang, X.X. Yan. Enhanced chitosan beads-supported Fe<sub>0</sub>-nanoparticles for removal of heavy metals from electroplating wastewater in permeable reactive barriers. *Water Research*, 2013, 47: 6691-6700.
